# Supplementary material
Source: Elsevier journal article supplement (https://univ-rennes.hal.science/hal-01533329v1/file/mmc1.docx)
Supplement: mmc1 [file mmc1.docx]

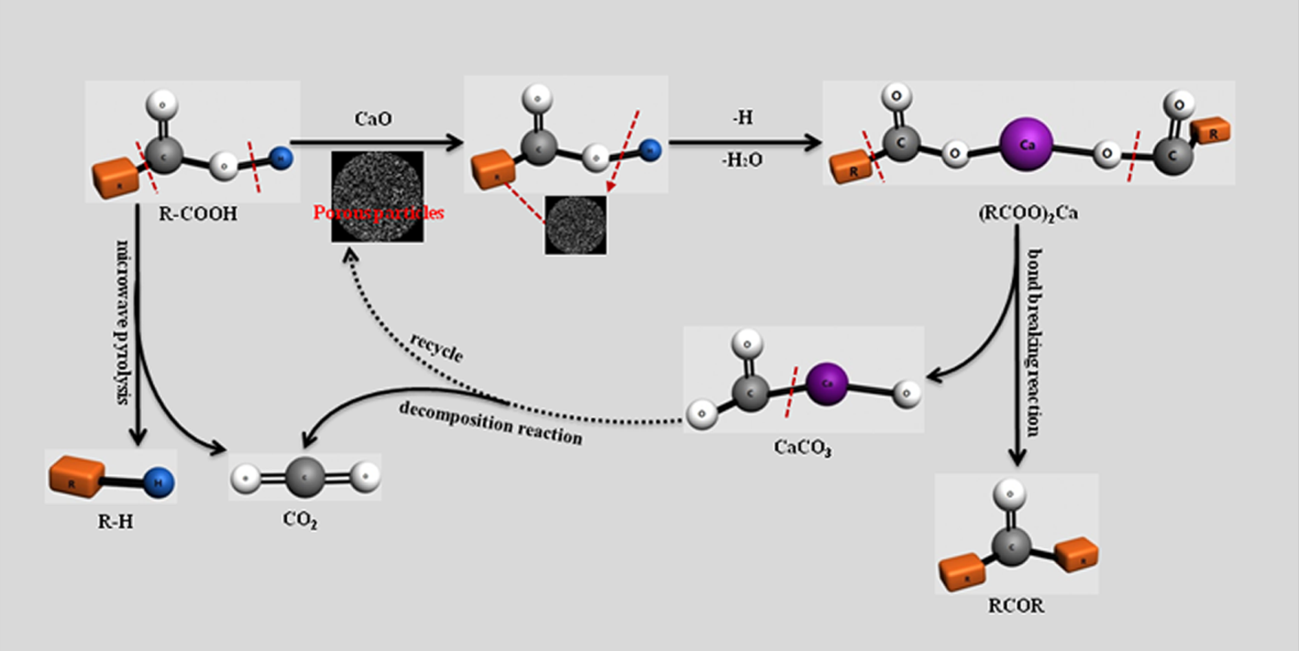


Schematic diagram of the deoxygenation mechanism of bio-oil in the pyrolysis of sludge catalyzed by CaO was shown in the figure. The pyrolysis of Carboxylic acid compounds (RCOOH) by CaO catalytic microwave can be divided into two reaction pathways. One, under the microwave irradiation, RH and CO2 was produced directly from cracking. Second, with CaO catalyst, (RCOO)2Ca the organic calcium salt of carboxylic acid was produced after the dehydrogenation and dehydration, thus carboxyl oxygen groups were fixed in the form of the organic calcium salts, and (RCOO)2Ca during the high temperature microwave pyrolysis continued to crack and produced CaCO3 and the ketone functional compounds (RCOR), while CaCO3 can decompose to produce CaO and CO2, and the CaO production can be recycled to be used as catalyst again.
